# Supplementary material for: Cytosolic DNA Sensor Upregulation Accompanies DNA Electrotransfer in B16.F10 Melanoma Cells
Source: PubMed Central journal article supplement — Mol Ther Nucleic Acids. 2016 Jun 7;5(6):e322–. doi: 10.1038/mtna.2016.34 (PMC5022127; doi:10.1038/mtna.2016.34), 2016-06-07
Supplement: mtna201634x1.pdf [file mtna201634x1.pdf]

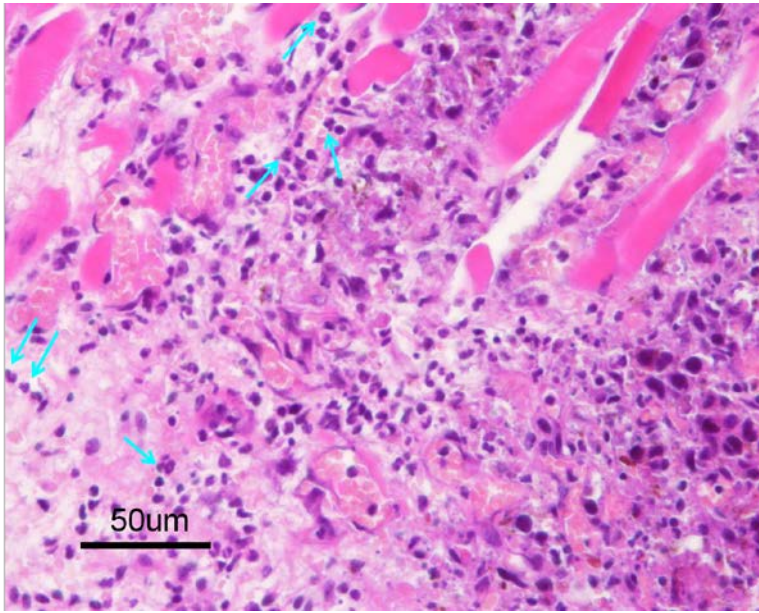

**Figure S1. The presence of inflammatory immune cells in melanoma tumor after pDNA electrotransfer.** Blue arrows indicates infiltration of granulocytes at the edge of the tumor.

**Table S1. Primers used in this study.**

|              |                            |
|--------------|----------------------------|
| BA2-for      | GAAGTGTGACGTTGACATCC       |
| BA2-rev      | ACTCATCGTACTCCTGCTTG       |
| GAPDH-FW     | TTCACCACCATGGAGAAGGC       |
| GAPDH-RV     | GGCATGGACTGTGGTCATGA       |
| mAIM2-807F   | CCACCCGCAGTGACAATGACTTTA   |
| mAIM2-954R   | GCTTTCAGCACCGTGACAACAAGT   |
| mcGas-for    | GTGAGGACCAATCTAAGACGAG     |
| mcGas-rev    | AGCATGTTTTTCTCTATCCCGTG    |
| mDAI-1081F   | TGCTTTCTAGAGGACGCCACCATT   |
| mDAI-1213R   | TGGCTTCAGAGCTTGTACCTGTGT   |
| mDDX41-for   | AGTGCTCATGGACCTCAAAG       |
| mDDX41-rev   | CTCCACAGAAGGCACAGC         |
| mDDX60-4160F | ACTGGAACACTCGCTTTGG        |
| mDDX60-4306R | GAAGTAGACATCACCCAACAGG     |
| mDHX9-for    | AAACTCCCCATTGAACCTCG       |
| mDHX9-rev    | TGTATCCCAGGCGTTTTCC        |
| mDHX36-for   | CCCAAAGTTGCTAAAATCCGAC     |
| mDHX36-rev   | CCAGTTGTAGTGGAAAGTCTGTC    |
| mLRR-462F    | CCAGTTTGCCGAAGTGAAAG       |
| mLRR-559R    | CTCTCCGTTGGTGGCTATTT       |
| mp202-1145F  | CCCGGGAAACACCATTGCTTTATCAG |
| mp202-1233R  | TCTTCACCTCAGACACGCTGGAAT   |
| mp204-693F   | CCAGTCACCAATACTCCACAG      |
| mp204-831R   | GAGCACCATCACTGTCAGG        |
| mRIG1-1581F  | GCTGCCATGCAGAGTGATTGGAAA   |
| mRIG1-1749R  | ACTCTTGGCCACACAGCTGTAGAA   |
| mTLR9-88F    | GAATCCTCCATCTCCCAACAT      |
| mTLR9-179R   | CAGAGTCTCAGCCAGCAC         |
| mIFNb1-241F  | TGGCCATCCAAGAGATGCTCCAGA   |
| mIFNb1-364R  | AGAAACACTGTCTGCTGGTGGAGT   |
| mIL1b-140f   | AGTTGACGGACCCCCAAAAGA      |
| mIL1b-232r   | TGCTGCTGCGAGATTTGAAG       |

## Control

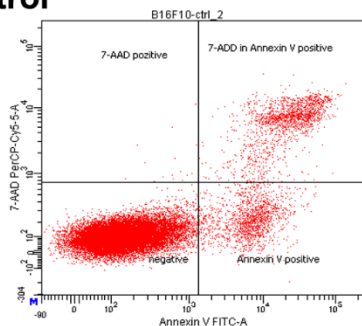

Experiment Name: Masa\_Annexin-V\_7-AAD\_10-02-2016  
Specimen Name: B16F10  
Tube Name: ctrl\_2  
Record Date: Feb 10, 2016 8:58:45 AM

| Population                  | #Events | %Parent% | Grand Pa... | %Total | Annexin V ... 7-AAD Per... |        |
|-----------------------------|---------|----------|-------------|--------|----------------------------|--------|
|                             |         |          |             |        | Median                     | Median |
| All Events                  | 40,000  | ###      | ###         | 100.0  | 146                        | 72     |
| P1                          | 27,733  | 69.3     | ###         | 69.3   | 158                        | 97     |
| 7-AAD positive              | 15      | 0.1      | 0.0         | 0.0    | 623                        | 980    |
| 7-ADD in Annexin V positive | 1,752   | 6.3      | 4.4         | 4.4    | 24,162                     | 6,910  |
| negative                    | 24,390  | 87.9     | 61.0        | 61.0   | 140                        | 89     |
| Annexin V positive          | 1,576   | 5.7      | 3.9         | 3.9    | 6,922                      | 203    |

## EP

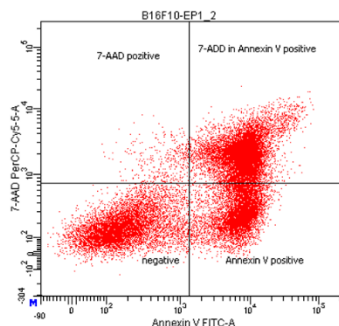

Experiment Name: Masa\_Annexin-V\_7-AAD\_10-02-2016  
Specimen Name: B16F10  
Tube Name: EP1\_2  
Record Date: Feb 10, 2016 9:03:51 AM

| Population                  | #Events | %Parent% | Grand Pa... | %Total | Annexin V ... 7-AAD Per... |        |
|-----------------------------|---------|----------|-------------|--------|----------------------------|--------|
|                             |         |          |             |        | Median                     | Median |
| All Events                  | 40,000  | ###      | ###         | 100.0  | 1,892                      | 208    |
| P1                          | 26,241  | 65.6     | ###         | 65.6   | 5,965                      | 500    |
| 7-AAD positive              | 349     | 1.3      | 0.9         | 0.9    | 689                        | 1,614  |
| 7-ADD in Annexin V positive | 11,206  | 42.7     | 28.0        | 28.0   | 8,408                      | 1,920  |
| negative                    | 7,673   | 29.2     | 19.2        | 19.2   | 168                        | 148    |
| Annexin V positive          | 7,013   | 26.7     | 17.5        | 17.5   | 7,362                      | 279    |

## EP1

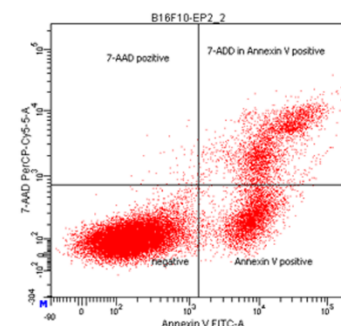

Experiment Name: Masa\_Annexin-V\_7-AAD\_10-02-2016  
Specimen Name: B16F10  
Tube Name: EP2\_2  
Record Date: Feb 10, 2016 9:10:09 AM

| Population                  | #Events | %Parent% | Grand Pa... | %Total | Annexin V ... 7-AAD Per... |        |
|-----------------------------|---------|----------|-------------|--------|----------------------------|--------|
|                             |         |          |             |        | Median                     | Median |
| All Events                  | 40,000  | ###      | ###         | 100.0  | 195                        | 88     |
| P1                          | 27,892  | 69.7     | ###         | 69.7   | 219                        | 116    |
| 7-AAD positive              | 44      | 0.2      | 0.1         | 0.1    | 835                        | 1,117  |
| 7-ADD in Annexin V positive | 3,390   | 12.2     | 8.5         | 8.5    | 14,300                     | 2,949  |
| negative                    | 20,569  | 73.7     | 51.4        | 51.4   | 162                        | 91     |
| Annexin V positive          | 3,889   | 13.9     | 9.7         | 9.7    | 7,750                      | 245    |

## pDNA

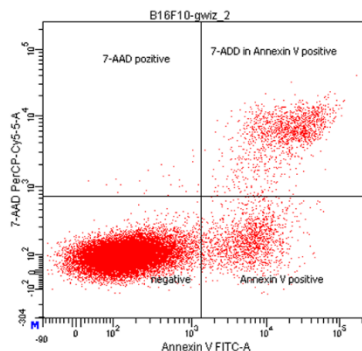

Experiment Name: Masa\_Annexin-V\_7-AAD\_10-02-2016  
Specimen Name: B16F10  
Tube Name: gwiz\_2  
Record Date: Feb 10, 2016 9:01:18 AM

| Population                  | #Events | %Parent% | Grand Pa... | %Total | Annexin V ... 7-AAD Per... |        |
|-----------------------------|---------|----------|-------------|--------|----------------------------|--------|
|                             |         |          |             |        | Median                     | Median |
| All Events                  | 40,000  | ###      | ###         | 100.0  | 139                        | 58     |
| P1                          | 24,283  | 60.7     | ###         | 60.7   | 160                        | 91     |
| 7-AAD positive              | 23      | 0.1      | 0.1         | 0.1    | 516                        | 1,159  |
| 7-ADD in Annexin V positive | 1,542   | 6.4      | 3.9         | 3.9    | 20,930                     | 6,106  |
| negative                    | 21,054  | 86.7     | 52.6        | 52.6   | 138                        | 82     |
| Annexin V positive          | 1,664   | 6.9      | 4.2         | 4.2    | 6,041                      | 174    |

## EP+pDNA

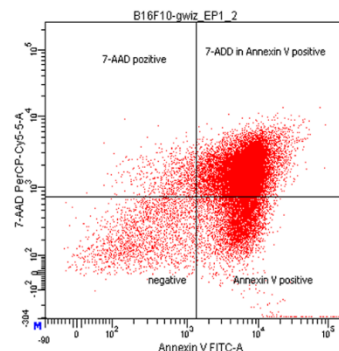

Experiment Name: Masa\_Annexin-V\_7-AAD\_10-02-2016  
Specimen Name: B16F10  
Tube Name: gwiz\_EP1\_2  
Record Date: Feb 10, 2016 9:06:15 AM

| Population                  | #Events | %Parent% | Grand Pa... | %Total | Annexin V ... 7-AAD Per... |        |
|-----------------------------|---------|----------|-------------|--------|----------------------------|--------|
|                             |         |          |             |        | Median                     | Median |
| All Events                  | 40,000  | ###      | ###         | 100.0  | 4,779                      | 898    |
| P1                          | 27,889  | 69.7     | ###         | 69.7   | 6,272                      | 1,292  |
| 7-AAD positive              | 658     | 2.4      | 1.6         | 1.6    | 765                        | 1,324  |
| 7-ADD in Annexin V positive | 19,780  | 70.9     | 49.4        | 49.4   | 6,901                      | 1,632  |
| negative                    | 1,807   | 6.5      | 4.5         | 4.5    | 311                        | 221    |
| Annexin V positive          | 5,644   | 20.2     | 14.1        | 14.1   | 5,701                      | 407    |

## EP1+pDNA

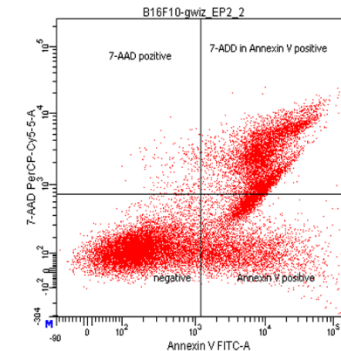

Experiment Name: Masa\_Annexin-V\_7-AAD\_10-02-2016  
Specimen Name: B16F10  
Tube Name: gwiz\_EP2\_2  
Record Date: Feb 10, 2016 9:12:49 AM

| Population                  | #Events | %Parent% | Grand Pa... | %Total | Annexin V ... 7-AAD Per... |        |
|-----------------------------|---------|----------|-------------|--------|----------------------------|--------|
|                             |         |          |             |        | Median                     | Median |
| All Events                  | 40,000  | ###      | ###         | 100.0  | 573                        | 131    |
| P1                          | 24,311  | 60.8     | ###         | 60.8   | 1,681                      | 186    |
| 7-AAD positive              | 200     | 0.8      | 0.5         | 0.5    | 728                        | 1,755  |
| 7-ADD in Annexin V positive | 7,287   | 30.0     | 18.2        | 18.2   | 9,674                      | 2,325  |
| negative                    | 11,220  | 46.2     | 28.1        | 28.1   | 181                        | 109    |
| Annexin V positive          | 5,604   | 23.1     | 14.0        | 14.0   | 4,904                      | 172    |

Figure S2. Cell death mechanisms as determined by flow cytometry (FITC Annexin V Apoptosis Detection Kit with 7-AAD, BioLegend, San Diego, CA, USA)
